# Supplementary material for: On-line pre-treatment, separation, and nanoelectrospray mass spectrometric determinations for pesticide metabolites and peptides based on a modular microfluidic platform
Source: Royal Society of Chemistry journal article supplement (doi:10.1039/c8ra08276f), 2018-01-01
Supplement: c8ra08276f1.pdf [file c8ra08276f1.pdf]

## Electronic Supplementary Information

---

# On-line pre-treatment, separation, and nanoelectrospray mass spectrometric determinations for pesticide metabolites and peptides based on a modular microfluidic platform<sup>†</sup>

Yinyin Hao,<sup>a, bt</sup> Yajing Bao,<sup>bt</sup> Xueying Huang,<sup>b</sup> Yijun Hu<sup>a</sup> and Bo Xiong<sup>\*b</sup>

<sup>a</sup> School of Mathematics and Statistics, Wuhan University, Wuhan, China.

<sup>b</sup> Key Laboratory of Pesticides & Chemical Biology, Ministry of Education, Institute of Public Health and Molecular Medicine Analysis, College of Chemistry, Central China Normal University, Wuhan, China.

**\*Corresponding Author**

E-mail: bx@mail.ccnu.edu.cn.

**First Author**

<sup>†</sup> These two authors contribute equally to this article.

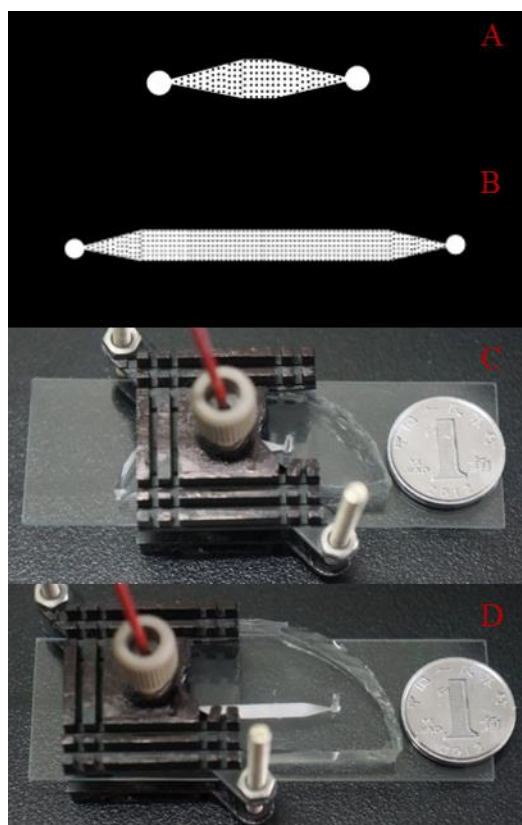

**Fig. S1** Photomasks of pretreatment and separation chips (A, B), and prepared pretreatment and separation modules (C, D) with tubing holders and plate porous filters (2  $\mu\text{m}$ ) to introduce solutions and maintaining the stationary phase (silica particles, 5  $\mu\text{m}$ ).

## Electronic Supplementary Information

---

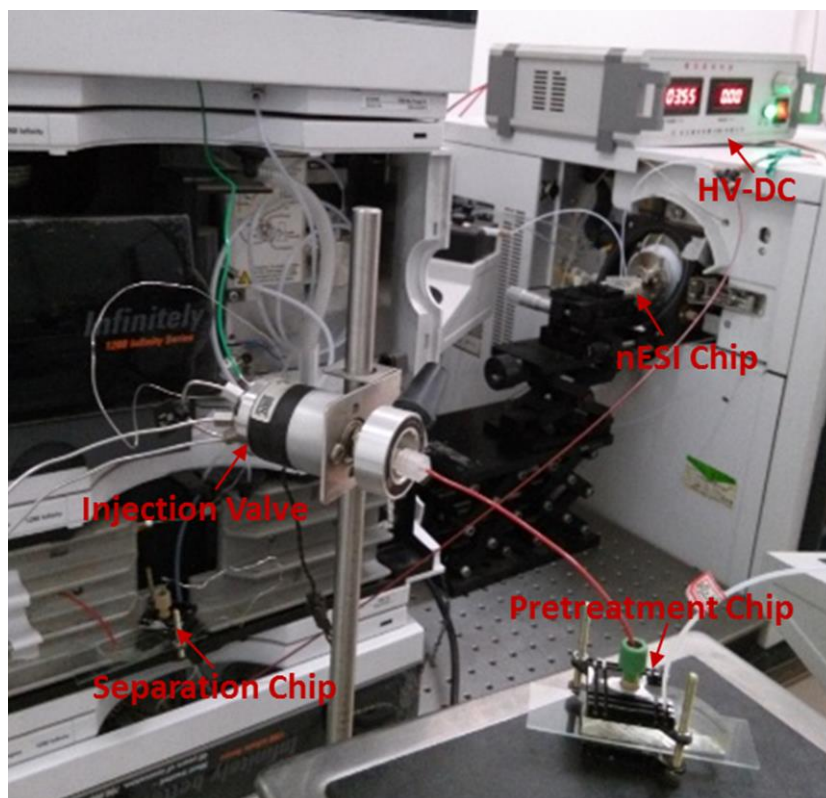

**Fig. S2** Instrumental setup of the proposed modular platform, composed of pretreatment, separation, and nESI chips coupled with an injection valve and a TOF-MS.

## Electronic Supplementary Information

**Table S1** The composition of a PCR mixture (A) and its amplification program (B).

| (A)                                       |                      |  |
|-------------------------------------------|----------------------|--|
| Reagent                                   | Volume<br>( $\mu$ L) |  |
| SYBR. Premix Ex Taq. II (Tli RNaseH Plus) | 12.5                 |  |
| PCR Forward Primer (10 $\mu$ M)           | 1                    |  |
| PCR Reverse Primer (10 $\mu$ M)           | 1                    |  |
| DNA model                                 | 2                    |  |
| dH <sub>2</sub> O                         | 8.5                  |  |
| Total                                     | 25                   |  |

  

| (B)    |      |            |
|--------|------|------------|
| Step 1 | 94°C | 3min       |
| Step 2 | 94°C | 5s         |
|        | 60°C | 30s        |
|        |      | } 20cycles |
| Step 3 | 12°C | $\infty$   |

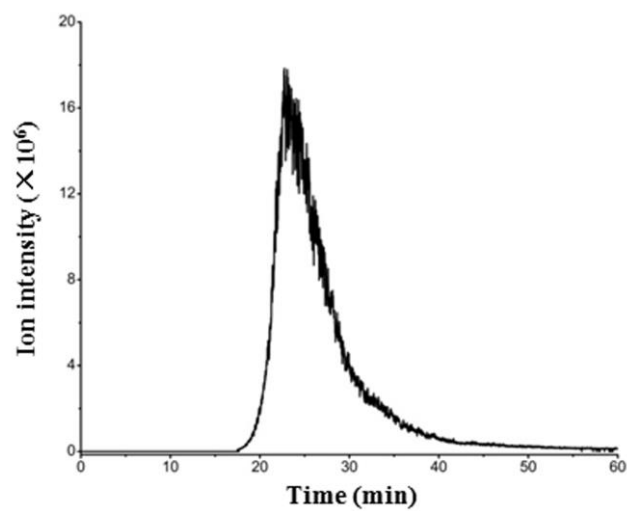

**Fig. S3** EIC of the reserpine ( $5 \text{ ng } \mu\text{L}^{-1}$ ,  $2 \text{ } \mu\text{L}$ ) determined by the modular microfluidic platform coupled with TOF-MS.
